# Supplementary material for: Robust determination of low Ti contents in zircon using LA–ICP–MS/MS with NH3 reaction gas
Source: Royal Society of Chemistry journal article supplement (doi:10.1039/d4ja00304g), 2024-01-01
Supplement: d4ja00304g2.pdf [file d4ja00304g2.pdf]

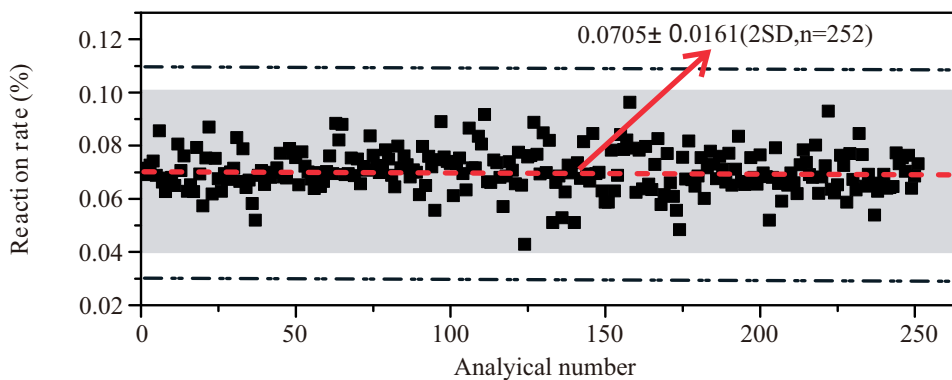

Figure S2 The long-term reaction rates (reacted/unreacted fractions) of  $^{256}\text{Zr}^{2+}$   
The Zr reaction rates were calculated by multiplication of secondary ionization yield of Zr ( $\sim 1.4\%$ )  
and  $^{96}\text{Zr}({}^{14}\text{N}^1\text{H})_2({}^{14}\text{N}^1\text{H}_3)_8^{2+}$  reaction rate ( $\sim 5.2\%$ )
