# Supplementary material for: Robust determination of low Ti contents in zircon using LA–ICP–MS/MS with NH3 reaction gas
Source: Royal Society of Chemistry journal article supplement (doi:10.1039/d4ja00304g), 2024-01-01
Supplement: d4ja00304g5.xlsx [file d4ja00304g5.xlsx]

## Sheet: Figure S2
	Figure S2 Ti content data of M257 measured using SQ and TQ modes and a spot size of 15 μm
	Sensitivity data					Content data
	Sample	TQ (15U5Hz+N2)		SQ (15U5Hz+N2)		Sample	TQ (15U5Hz+N2)			SQ (15U5Hz+N2)
		48Ti(14N1H)(14N1H3)4/CPS	Background value/CPS	49Ti/CPS	Background value/CPS		Ti/mg g-1	2SE	LOD	Ti/mg g-1	2SE	LOD
	M257-1	28.1349	0.9375	53.4736	50.547	M257-1	3.31976	0.397825	0.494528	2.59248	1.85218	6.22566
	M257-2	25.8136	1.45833	54.1449	51.4845	M257-2	2.88713	0.329387	0.513276	2.87753	1.94356	8.81007
	M257-3	26.7602	1.97917	54.408	46.8519	M257-3	3.25495	0.426501	0.528432	2.85215	2.21824	9.23124
	M257-4	22.6515	1.25	54.9338	47.9631	M257-4	3.20607	0.395874	0.54231	4.37868	2.29837	8.43348
	M257-5	25.9493	1.77083	53.8718	49.9075	M257-5	3.29249	0.436033	0.514811	3.00395	2.15108	6.46247
	M257-6	24.7959	0.833334	52.0134	49.8149	M257-6	3.01197	0.404864	0.426091	0.398919	2.37936	7.28496
	M257-7	21.2439	0.625	54.1449	49.352	M257-7	3.60164	0.583378	0.547809	2.93836	2.02825	7.16942
	M257-8	26.599	1.66667	52.7413	49.5371	M257-8	3.26187	0.356795	0.435533	0.929209	2.15508	6.64981
	M257-9	28.1895	1.04167	54.9559	53.1483	M257-9	3.34617	0.355165	0.453484	4.20145	2.67816	8.11734
	M257-10	25.837	1.25	52.3452	49.8149	M257-10	3.61593	0.456322	0.469347	0.724267	1.69273	6.97821
