# Supplementary material for: Robust determination of low Ti contents in zircon using LA–ICP–MS/MS with NH3 reaction gas
Source: Royal Society of Chemistry journal article supplement (doi:10.1039/d4ja00304g), 2024-01-01
Supplement: d4ja00304g6.pdf [file d4ja00304g6.pdf]

Table S3 Instrumental parameters of LA-SF-ICP-MS for zircon Ti measurement

Ti content of **zircon samples** was determined by laser ablation-inductively coupled plasma-mass spectrometry (LA-ICP-MS) employing an Element XR HR-ICP-MS instrument (Thermo Fisher Scientific, USA) coupled to a 193nm ArF excimer laser system (Geolas HD, Lambda Physik, Göttingen, Germany) at the State Key Laboratory of Lithospheric Evolution, Institute of Geology and Geophysics, Chinese Academy of Sciences. The approach is similar to that outlined in **Wu et al. (2018)** with isotopes measured using a peak-hopping mode with a laser diameter of ca. **32 μm** and **5 Hz** repetition rate. The laser energy density is **~4.0 J/cm<sup>2</sup> (Wu et al., 2018)**. The Element XR is equipped with the so-called “jet-interface”, comprising of a jet sample cone, an H-version skimmer cone and a high capacity vacuum pump (OnTool Booster 150, Asslar, Germany). This leads to a signal enhancement in laser sampling mode by a factor of 3-5, resulting in an improved detection capability. Helium was employed as the ablation gas to improve the transporting efficiency of ablated aerosols. NIST SRM 610 and ARM-1 reference glass was used for external calibration (**Jochum et al., 2011; Wu et al., 2019; Wu et al., 2021**). **Silicon (<sup>29</sup>Si)** was used as an internal standard. The resulting data were reduced based on the **Iolite 3.4 software**. For Ti (>0.005 μg/g), the accuracy is better than ±10 % with analytical precision (1 RSD) of ±10%.

| <b>Laser system</b>                                      |                                                                                                                                                                                                                                                                                                                                                                                                                                                                                                                                                                                                                                                                                                                                    |
|----------------------------------------------------------|------------------------------------------------------------------------------------------------------------------------------------------------------------------------------------------------------------------------------------------------------------------------------------------------------------------------------------------------------------------------------------------------------------------------------------------------------------------------------------------------------------------------------------------------------------------------------------------------------------------------------------------------------------------------------------------------------------------------------------|
| Make, Model & type                                       | GeoLas HD 193 nm ArF                                                                                                                                                                                                                                                                                                                                                                                                                                                                                                                                                                                                                                                                                                               |
| Laser wave length                                        | 193 nm                                                                                                                                                                                                                                                                                                                                                                                                                                                                                                                                                                                                                                                                                                                             |
| Pulse width                                              | 20ns                                                                                                                                                                                                                                                                                                                                                                                                                                                                                                                                                                                                                                                                                                                               |
| Energy density/fluence                                   | 3J cm <sup>-2</sup>                                                                                                                                                                                                                                                                                                                                                                                                                                                                                                                                                                                                                                                                                                                |
| Repetition rat                                           | 5Hz                                                                                                                                                                                                                                                                                                                                                                                                                                                                                                                                                                                                                                                                                                                                |
| Spot size                                                | 32μm                                                                                                                                                                                                                                                                                                                                                                                                                                                                                                                                                                                                                                                                                                                               |
| Sampling mode/patten                                     | Single point ablation                                                                                                                                                                                                                                                                                                                                                                                                                                                                                                                                                                                                                                                                                                              |
| Ablation gas flow (He)                                   | 0.75L min <sup>-1</sup>                                                                                                                                                                                                                                                                                                                                                                                                                                                                                                                                                                                                                                                                                                            |
| Ablation duration                                        | 35s                                                                                                                                                                                                                                                                                                                                                                                                                                                                                                                                                                                                                                                                                                                                |
| <b>ICPMS</b>                                             |                                                                                                                                                                                                                                                                                                                                                                                                                                                                                                                                                                                                                                                                                                                                    |
| Make, Model & type                                       | Thermo Element XR                                                                                                                                                                                                                                                                                                                                                                                                                                                                                                                                                                                                                                                                                                                  |
| RF Power                                                 | 1320W                                                                                                                                                                                                                                                                                                                                                                                                                                                                                                                                                                                                                                                                                                                              |
| Guard electrode (Pt)                                     | Connected                                                                                                                                                                                                                                                                                                                                                                                                                                                                                                                                                                                                                                                                                                                          |
| Sample cone                                              | nickel standard cone, Jet sample cone                                                                                                                                                                                                                                                                                                                                                                                                                                                                                                                                                                                                                                                                                              |
| Skimmer cone                                             | nickel “H” skimmer cone                                                                                                                                                                                                                                                                                                                                                                                                                                                                                                                                                                                                                                                                                                            |
| Coolant gas flow (Ar)                                    | 15.00L min <sup>-1</sup>                                                                                                                                                                                                                                                                                                                                                                                                                                                                                                                                                                                                                                                                                                           |
| Auxiliary gas flow (Ar)                                  | 0.80L min <sup>-1</sup>                                                                                                                                                                                                                                                                                                                                                                                                                                                                                                                                                                                                                                                                                                            |
| Carrier gas flow (Ar)                                    | 0.95L min <sup>-1</sup>                                                                                                                                                                                                                                                                                                                                                                                                                                                                                                                                                                                                                                                                                                            |
| Scan mode                                                | E-scan                                                                                                                                                                                                                                                                                                                                                                                                                                                                                                                                                                                                                                                                                                                             |
| Isotopes measured (m/z) <sup>+</sup><br>sample time (ms) | <sup>7</sup> Li(6), <sup>27</sup> Al(11), <sup>29</sup> Si(11), <sup>31</sup> P(20), <sup>49</sup> Ti(50), <sup>57</sup> Fe(6), <sup>89</sup> Y(11),<br><sup>93</sup> Nb(6), <sup>100</sup> Mo(6), <sup>95</sup> Mo(6), <sup>98</sup> Mo(6), <sup>118</sup> Sn(6), <sup>139</sup> La(6), <sup>140</sup> Ce(6),<br><sup>141</sup> Pr(6), <sup>146</sup> Nd(6), <sup>147</sup> Sm(6), <sup>153</sup> Eu(6), <sup>158</sup> Gd(6), <sup>159</sup> Tb(6),<br><sup>163</sup> Dy(6), <sup>165</sup> Ho(6), <sup>166</sup> Er(6), <sup>169</sup> Tm(6), <sup>172</sup> Yb(6), <sup>173</sup> Yb(6),<br><sup>175</sup> Lu(6), <sup>178</sup> Hf(11), <sup>181</sup> Ta(6), <sup>182</sup> W(6), <sup>232</sup> Th(6), <sup>238</sup> U(11) |
| Mass window                                              | 20%                                                                                                                                                                                                                                                                                                                                                                                                                                                                                                                                                                                                                                                                                                                                |
| Sample per peak                                          | 20                                                                                                                                                                                                                                                                                                                                                                                                                                                                                                                                                                                                                                                                                                                                 |

|                                      |                                                                  |
|--------------------------------------|------------------------------------------------------------------|
| Detection system                     | Single SEM detector in triple mode, Counting, Analog and Faraday |
| Resolution (M/ $\Delta$ M)           | ~300                                                             |
| □ Total integration time per reading | 1.625s                                                           |

---

### reference

- Jochum, K.P., Weis, U., Stoll, B., Kuzmin, D., Yang, Q., Raczek, I., Jacob, D.E., Stracke, A., Birbaum, K., and Frick, D.A. (2011). Determination of reference values for NIST SRM 610–617 glasses following ISO guidelines. *Geostandards and Geoanalytical Research* 35, 397-429.
- Wu, S., Karius, V., Schmidt, B.C., Simon, K., and Wörner, G. (2018). Comparison of ultrafine powder pellet and flux - free fusion glass for bulk analysis of granitoids by laser ablation - inductively coupled plasma - mass spectrometry. *Geostandards and Geoanalytical Research* 42, 575-591.
- Wu, S., Wörner, G., Jochum, K.P., Stoll, B., Simon, K., and Kronz, A. (2019). The preparation and preliminary characterisation of three synthetic andesite reference glass materials (ARM - 1, ARM - 2, ARM - 3) for in situ microanalysis. *Geostandards and Geoanalytical Research* 43, 567-584.
- Wu, S., Yang, Y., Jochum, K.P., Romer, R.L., Glodny, J., Savov, I.P., Agostini, S., De Hoog, J.C., Peters, S.T., and Kronz, A. (2021). Isotopic Compositions (Li - B - Si - O - Mg - Sr - Nd - Hf - Pb) and Fe<sup>2+</sup>/ $\Sigma$ Fe Ratios of Three Synthetic Andesite Glass Reference Materials (ARM - 1, ARM - 2, ARM - 3). *Geostandards and Geoanalytical Research* 45, 719-745.
