# Supplementary figures and images for: Robust determination of low Ti contents in zircon using LA–ICP–MS/MS with NH3 reaction gas
Source: Royal Society of Chemistry journal article supplement (doi:10.1039/d4ja00304g), 2024-01-01

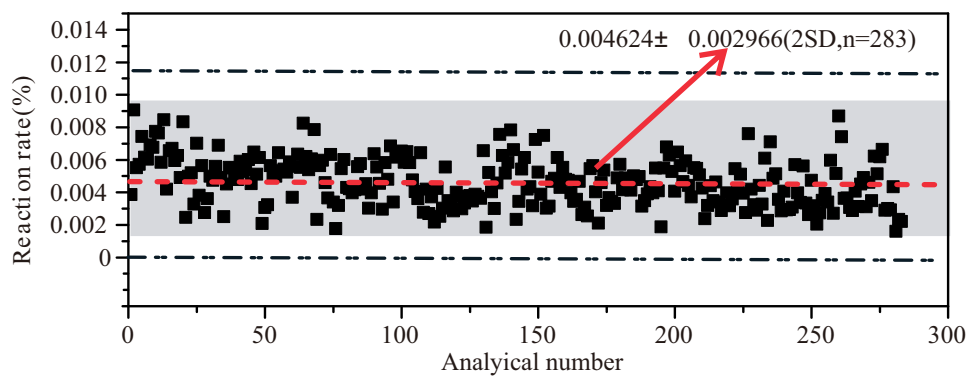

Figure S1 The long-term reaction rates (reacted/unreacted fractions) of Ca

Supplement: d4ja00304g1.pdf [file d4ja00304g1.pdf]

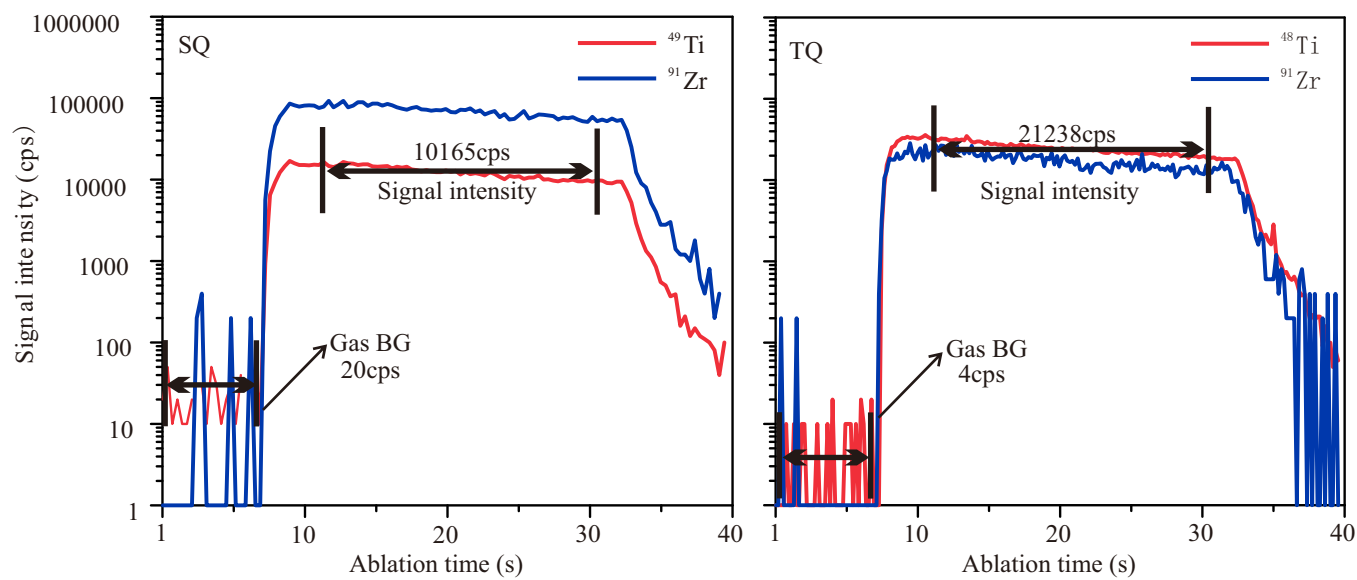

Figure S3 Laser ablation signal profiles of Ti and Zr in SQ mode and TQ mode

Supplement: d4ja00304g3.pdf [file d4ja00304g3.pdf]
